# Supplementary material for: Biliary Bicarbonate, pH, and Glucose Are Suitable Biomarkers of Biliary Viability During Ex Situ Normothermic Machine Perfusion of Human Donor Livers
Source: PubMed Central journal article supplement — Transplantation. 2019 Jun 26;103(7):1405–13. doi: 10.1097/TP.0000000000002500 (PMC6613725; doi:10.1097/tp.0000000000002500), 2019-06-26
Supplement: tp-103-1405-s001.pdf [file tp-103-1405-s001.pdf]

**Biliary Bicarbonate, pH and Glucose Are Suitable Biomarkers of Biliary Viability During Normothermic Machine Perfusion of Human Donor Livers**

Alix P.M. Matton, Yvonne de Vries, Laura C. Burlage, Rianne van Rijn, Masato Fujiyoshi,  
Vincent E. de Meijer, Marieke T. de Boer, Ruben H.J. de Kleine, Henkjan J. Verkade,  
Annette S. H. Gouw, Ton Lisman, Robert J. Porte

**SUPPLEMENTAL DIGITAL CONTENT**

**Table S1. Optimal Biliary Biomarker Cut-off Values per Time Point of NMP Based on AUC-ROC Analyses.**

| Biomarker                                | Number of Cases* | Cut-off Value    | Time of NMP  | AUC-ROC     | P - value    | Sens       | Spec       | PPV                   | NPV                   | LR+ (95% CI)               | LR- (95% CI)              |
|------------------------------------------|------------------|------------------|--------------|-------------|--------------|------------|------------|-----------------------|-----------------------|----------------------------|---------------------------|
| <b>Biliary Bicarbonate Concentration</b> | <b>21</b>        | <b>18 mmol/L</b> | <b>2.0 h</b> | <b>0.91</b> | <b>0.002</b> | <b>83%</b> | <b>89%</b> | <b>91% (61 – 98%)</b> | <b>80% (53 – 94%)</b> | <b>7.50 (1.16 – 48.43)</b> | <b>0.19 (0.05 – 0.68)</b> |
|                                          | 21               | 27 mmol/L        | 2.5 h        | 0.86        | 0.006        | 83%        | 78%        | 83% (59 – 95%)        | 78% (49 – 93%)        | 3.75 (1.08 – 13.07)        | 0.21 (0.06 – 0.80)        |
|                                          | 21               | 26 mmol/L        | 3.0 h        | 0.83        | 0.012        | 75%        | 78%        | 82% (56 – 94%)        | 70% (45 – 87%)        | 3.38 (0.95 – 11.96)        | 0.32 (0.11 – 0.91)        |
|                                          | 21               | 32 mmol/L        | 3.5 h        | 0.81        | 0.019        | 83%        | 67%        | 77% (56 – 90%)        | 75% (44 – 92%)        | 2.50 (0.96 – 6.52)         | 0.25 (0.07 – 0.96)        |
|                                          | 20               | 32 mmol/L        | 4.0 h        | 0.80        | 0.025        | 82%        | 67%        | 75% (53 – 89%)        | 75% (44 – 92%)        | 2.45 (0.94 – 6.44)         | 0.27 (0.07 – 1.04)        |
|                                          | 19               | 31 mmol/L        | 4.5 h        | 0.79        | 0.034        | 80%        | 67%        | 73% (50 – 88%)        | 75% (44 – 92%)        | 2.40 (0.91 – 6.36)         | 0.30 (0.08 – 1.13)        |
|                                          | 19               | 32 mmol/L        | 5.0 h        | 0.78        | 0.041        | 80%        | 67%        | 73% (50 – 88%)        | 75% (44 – 92%)        | 2.40 (0.91 – 6.36)         | 0.30 (0.08 – 1.13)        |
|                                          | 19               | 32 mmol/L        | 5.5 h        | 0.77        | 0.050        | 80%        | 67%        | 73% (50 – 88%)        | 75% (44 – 92%)        | 2.40 (0.91 – 6.36)         | 0.30 (0.08 – 1.13)        |
|                                          | 19               | 32 mmol/L        | 6.0 h        | 0.78        | 0.041        | 80%        | 67%        | 73% (50 – 88%)        | 75% (44 – 92%)        | 2.40 (0.91 – 6.36)         | 0.30 (0.08 – 1.13)        |
| <b>Biliary pH</b>                        | 21               | 7.32             | 2.0 h        | 0.75        | 0.051        | 75%        | 78%        | 82% (56 – 94%)        | 70% (45 – 87%)        | 3.38 (0.95 – 11.96)        | 0.32 (0.11 – 0.91)        |
|                                          | <b>21</b>        | <b>7.48</b>      | <b>2.5 h</b> | <b>0.81</b> | <b>0.019</b> | <b>75%</b> | <b>67%</b> | <b>75% (53 – 89%)</b> | <b>67% (40 – 86%)</b> | <b>2.25 (0.84 – 6.00)</b>  | <b>0.38 (0.13 – 1.11)</b> |
|                                          | 21               | 7.45             | 3.0 h        | 0.81        | 0.017        | 75%        | 78%        | 82% (56 – 94%)        | 70% (45 – 87%)        | 3.38 (0.95 – 11.96)        | 0.32 (0.11 – 0.91)        |
|                                          | 21               | 7.46             | 3.5 h        | 0.79        | 0.028        | 75%        | 78%        | 82% (56 – 94%)        | 70% (45 – 87%)        | 3.38 (0.95 – 11.96)        | 0.32 (0.11 – 0.91)        |
|                                          | 20               | 7.51             | 4.0 h        | 0.80        | 0.025        | 91%        | 67%        | 77% (57 – 90%)        | 86% (47 – 98%)        | 2.73 (1.06 – 7.00)         | 0.14 (0.02 – 0.93)        |
|                                          | 19               | 7.53             | 4.5 h        | 0.85        | 0.010        | 90%        | 67%        | 75% (54 – 89%)        | 86% (47 – 98%)        | 2.70 (1.05 – 6.96)         | 0.15 (0.02 – 1.02)        |
|                                          | 19               | 7.50             | 5.0 h        | 0.79        | 0.034        | 90%        | 67%        | 75% (54 – 89%)        | 86% (47 – 98%)        | 2.70 (1.05 – 6.96)         | 0.15 (0.02 – 1.02)        |
|                                          | 19               | 7.51             | 5.5 h        | 0.81        | 0.022        | 80%        | 67%        | 73% (50 – 88%)        | 75% (44 – 92%)        | 2.40 (0.91 – 6.36)         | 0.30 (0.08 – 1.13)        |
|                                          | 19               | 7.51             | 6.0 h        | 0.77        | 0.045        | 80%        | 67%        | 73% (50 – 88%)        | 75% (44 – 92%)        | 2.40 (0.91 – 6.36)         | 0.30 (0.08 – 1.13)        |
| <b>Biliary Glucose Concentration</b>     | <b>21</b>        | <b>16 mmol/L</b> | <b>2.0 h</b> | <b>0.82</b> | <b>0.013</b> | <b>92%</b> | <b>78%</b> | <b>85% (62 – 95%)</b> | <b>88% (51 – 98%)</b> | <b>4.12 (1.20 – 14.17)</b> | <b>0.11 (0.02 – 0.72)</b> |
|                                          | 21               | 27 mmol/L        | 2.5 h        | 0.77        | 0.039        | 67%        | 89%        | 89% (55 – 98%)        | 67% (47 – 82%)        | 6.00 (0.91 – 39.74)        | 0.38 (0.16 – 0.86)        |
|                                          | 21               | 24 mmol/L        | 3.0 h        | 0.81        | 0.015        | 69%        | 88%        | 90% (58 – 98%)        | 64% (43 – 80%)        | 5.54 (0.85 – 35.90)        | 0.35 (0.15 – 0.83)        |
|                                          | 22               | 23 mmol/L        | 3.5 h        | 0.81        | 0.015        | 69%        | 89%        | 90% (58 – 98%)        | 67% (46 – 82%)        | 6.23 (0.95 – 40.96)        | 0.35 (0.15 – 0.81)        |
|                                          | 22               | 22 mmol/L        | 4.0 h        | 0.81        | 0.016        | 69%        | 89%        | 90% (58 – 98%)        | 67% (46 – 82%)        | 6.23 (0.95 – 40.96)        | 0.35 (0.15 – 0.81)        |
|                                          | 21               | 23 mmol/L        | 4.5 h        | 0.79        | 0.028        | 67%        | 100%       | 100%                  | 69% (50 – 83%)        | n.a. <sup>†</sup>          | 0.33 (0.15 – 0.74)        |
|                                          | 20               | 21 mmol/L        | 5.0 h        | 0.82        | 0.015        | 73%        | 100%       | 100%                  | 75% (53 – 89%)        | n.a.                       | 0.27 (0.10 – 0.72)        |
|                                          | 19               | 20 mmol/L        | 5.5 h        | 0.80        | 0.027        | 70%        | 100%       | 100%                  | 75% (54 – 89%)        | n.a.                       | 0.30 (0.12 – 0.77)        |
|                                          | 19               | 19 mmol/L        | 6.0 h        | 0.80        | 0.027        | 70%        | 100%       | 100%                  | 75% (54 – 89%)        | n.a.                       | 0.30 (0.12 – 0.77)        |

| Biomarker                                         | Number of Cases | Cut-off Value     | Time of NMP  | AUC-ROC     | P - value    | Sens       | Spec       | PPV                   | NPV                   | LR+ (95% CI)               | LR- (95% CI)              |
|---------------------------------------------------|-----------------|-------------------|--------------|-------------|--------------|------------|------------|-----------------------|-----------------------|----------------------------|---------------------------|
| <b>Bile/Perfusate Glucose Ratio</b>               | <b>21</b>       | <b>0.67</b>       | <b>2.0 h</b> | <b>0.82</b> | <b>0.013</b> | <b>83%</b> | <b>78%</b> | <b>83% (59 – 95%)</b> | <b>78% (49 – 93%)</b> | <b>3.75 (1.08 – 13.07)</b> | <b>0.21 (0.06 – 0.80)</b> |
|                                                   | 21              | 0.70              | 2.5 h        | 0.71        | 0.110        | 83%        | 78%        | 83% (59 – 95%)        | 78% (49 – 93%)        | 3.75 (1.08 – 13.07)        | 0.21 (0.06 – 0.80)        |
|                                                   | 22              | 0.66              | 3.0 h        | 0.78        | 0.030        | 85%        | 78%        | 85% (61 – 95%)        | 78% (48 – 93%)        | 3.81 (1.10 – 13.21)        | 0.20 (0.05 – 0.74)        |
|                                                   | 22              | 0.70              | 3.5 h        | 0.77        | 0.035        | 85%        | 78%        | 85% (61 – 95%)        | 78% (48 – 93%)        | 3.81 (1.10 – 13.21)        | 0.20 (0.05 – 0.74)        |
|                                                   | 21              | 0.73              | 4.0 h        | 0.76        | 0.042        | 77%        | 78%        | 83% (59 – 95%)        | 70% (45 – 87%)        | 3.46 (0.98 – 12.18)        | 0.30 (0.10 – 0.85)        |
|                                                   | 20              | 0.72              | 4.5 h        | 0.77        | 0.039        | 75%        | 67%        | 75% (53 – 89%)        | 67% (40 – 86%)        | 2.25 (0.84 – 6.00)         | 0.38 (0.13 – 1.11)        |
|                                                   | 19              | 0.74              | 5.0 h        | 0.75        | 0.063        | 82%        | 78%        | 82% (56 – 94%)        | 78% (49 – 93%)        | 3.68 (1.05 – 12.90)        | 0.23 (0.06 – 0.86)        |
|                                                   | 18              | 0.78              | 5.5 h        | 0.75        | 0.066        | 70%        | 89%        | 88% (51 – 98%)        | 73% (50 – 88%)        | 6.30 (0.95 – 41.78)        | 0.34 (0.13 – 0.89)        |
| <b>Delta Perfusate Bile Glucose Concentration</b> | 21              | 10.0 mmol/L       | 2.0 h        | 0.74        | 0.065        | 92%        | 67%        | 77% (57 – 90%)        | 86% (47 – 98%)        | 2.73 (1.06 – 7.00)         | 0.14 (0.02 – 0.93)        |
|                                                   | 21              | 8.3 mmol/L        | 2.5 h        | 0.71        | 0.102        | 92%        | 67%        | 77% (57 – 90%)        | 86% (47 – 98%)        | 2.73 (1.06 – 7.00)         | 0.14 (0.02 – 0.93)        |
|                                                   | <b>22</b>       | <b>2.3 mmol/L</b> | <b>3.0 h</b> | <b>0.79</b> | <b>0.023</b> | <b>69%</b> | <b>89%</b> | <b>79% (59 – 90%)</b> | <b>86% (46 – 98%)</b> | <b>2.75 (1.07 – 7.04)</b>  | <b>0.13 (0.02 – 0.86)</b> |
|                                                   | 22              | 2.6 mmol/L        | 3.5 h        | 0.76        | 0.042        | 69%        | 89%        | 82% (56 – 94%)        | 70% (45 – 87%)        | 3.38 (0.95 – 11.96)        | 0.32 (0.11 – 0.91)        |
|                                                   | 21              | 4.9 mmol/L        | 4.0 h        | 0.74        | 0.065        | 75%        | 78%        | 80% (53 – 93%)        | 70% (46 – 87%)        | 3.27 (0.91 – 11.71)        | 0.35 (0.13 – 0.98)        |
|                                                   | 20              | 4.8 mmol/L        | 4.5 h        | 0.74        | 0.074        | 73%        | 78%        | 78% (49 – 93%)        | 70% (46 – 86%)        | 3.15 (0.87 – 11.42)        | 0.39 (0.14 – 1.06)        |
|                                                   | 19              | 4.3 mmol/L        | 5.0 h        | 0.74        | 0.079        | 70%        | 78%        | 75% (45 – 92%)        | 70% (46 – 86%)        | 3.00 (0.81 – 11.08)        | 0.43 (0.16 – 1.15)        |
|                                                   | 18              | 2.9 mmol/L        | 5.5 h        | 0.73        | 0.102        | 67%        | 89%        | 86% (47 – 98%)        | 73% (51 – 87%)        | 6.00 (0.89 – 40.31)        | 0.38 (0.14 – 0.97)        |
| <b>Biliary LDH Concentration</b>                  | <b>21</b>       | <b>3689 U/L</b>   | <b>2.0 h</b> | <b>0.83</b> | <b>0.014</b> | <b>69%</b> | <b>88%</b> | <b>90% (58 – 98%)</b> | <b>64% (43 – 81%)</b> | <b>5.54 (0.85 – 35.90)</b> | <b>0.35 (0.15 – 0.83)</b> |
|                                                   | 22              | 4710 U/L          | 2.5 h        | 0.78        | 0.03         | 69%        | 78%        | 82% (55 – 94%)        | 64% (42 – 81%)        | 3.12 (0.87 – 11.15)        | 0.40 (0.16 – 0.96)        |
|                                                   | 22              | 2393 U/L          | 3.0 h        | 0.79        | 0.025        | 69%        | 67%        | 75% (53 – 89%)        | 60% (37 – 79%)        | 2.08 (0.77 – 5.60)         | 0.46 (0.18 – 1.18)        |
|                                                   | 22              | 3696 U/L          | 3.5 h        | 0.79        | 0.021        | 69%        | 89%        | 90% (58 – 98%)        | 67% (46 – 82%)        | 6.23 (0.95 – 40.96)        | 0.35 (0.15 – 0.81)        |
|                                                   | 21              | 2749 U/L          | 4.0 h        | 0.72        | 0.088        | 67%        | 78%        | 80% (53 – 94%)        | 64% (42 – 81%)        | 3.00 (0.83 – 10.86)        | 0.43 (0.18 – 1.03)        |
|                                                   | 21              | 2818 U/L          | 4.5 h        | 0.74        | 0.065        | 67%        | 78%        | 80% (53 – 94%)        | 64% (42 – 81%)        | 3.00 (0.83 – 10.86)        | 0.43 (0.18 – 1.03)        |
|                                                   | 20              | 2210 U/L          | 5.0 h        | 0.73        | 0.087        | 64%        | 78%        | 78% (49 – 93%)        | 64% (43 – 80%)        | 2.86 (0.78 – 10.52)        | 0.47 (0.20 – 1.10)        |
|                                                   | 20              | 2614 U/L          | 5.5 h        | 0.75        | 0.063        | 64%        | 78%        | 78% (49 – 93%)        | 64% (43 – 80%)        | 2.86 (0.78 – 10.52)        | 0.47 (0.20 – 1.10)        |
|                                                   | 20              | 2445 U/L          | 6.0 h        | 0.69        | 0.149        | 64%        | 89%        | 88% (51 – 98%)        | 67% (47 – 82%)        | 5.73 (0.86 – 38.34)        | 0.41 (0.18 – 0.92)        |

*Bold and italic values are the chosen cut-off points based on the first bile sample with an AUCROC >0.80 and a P-value <0.05.*

*\* Values do not add up to the total of 23 due to livers not producing bile at every time point, or occasional errors in reporting values by the ABL90 FLEX analyzer.*

<sup>†</sup> When specificity is 100%, calculating the LR+ is mathematically impossible.

*Abbreviations: AUC-ROC, area under the curve of the receiver operating characteristics curve; CI, confidence interval; LDH, lactate dehydrogenase; LR+ positive likelihood ratio; LR-, negative likelihood ratio; NMP, normothermic machine perfusion; n.a., not applicable; NPV, negative predictive value; PPV, positive predictive value; Sens, sensitivity; Spec, specificity.*

Figure S1. (Cumulative) bile production did not correlate with biliary pH, bicarbonate, glucose, bile/perfusate ratio or LDH.

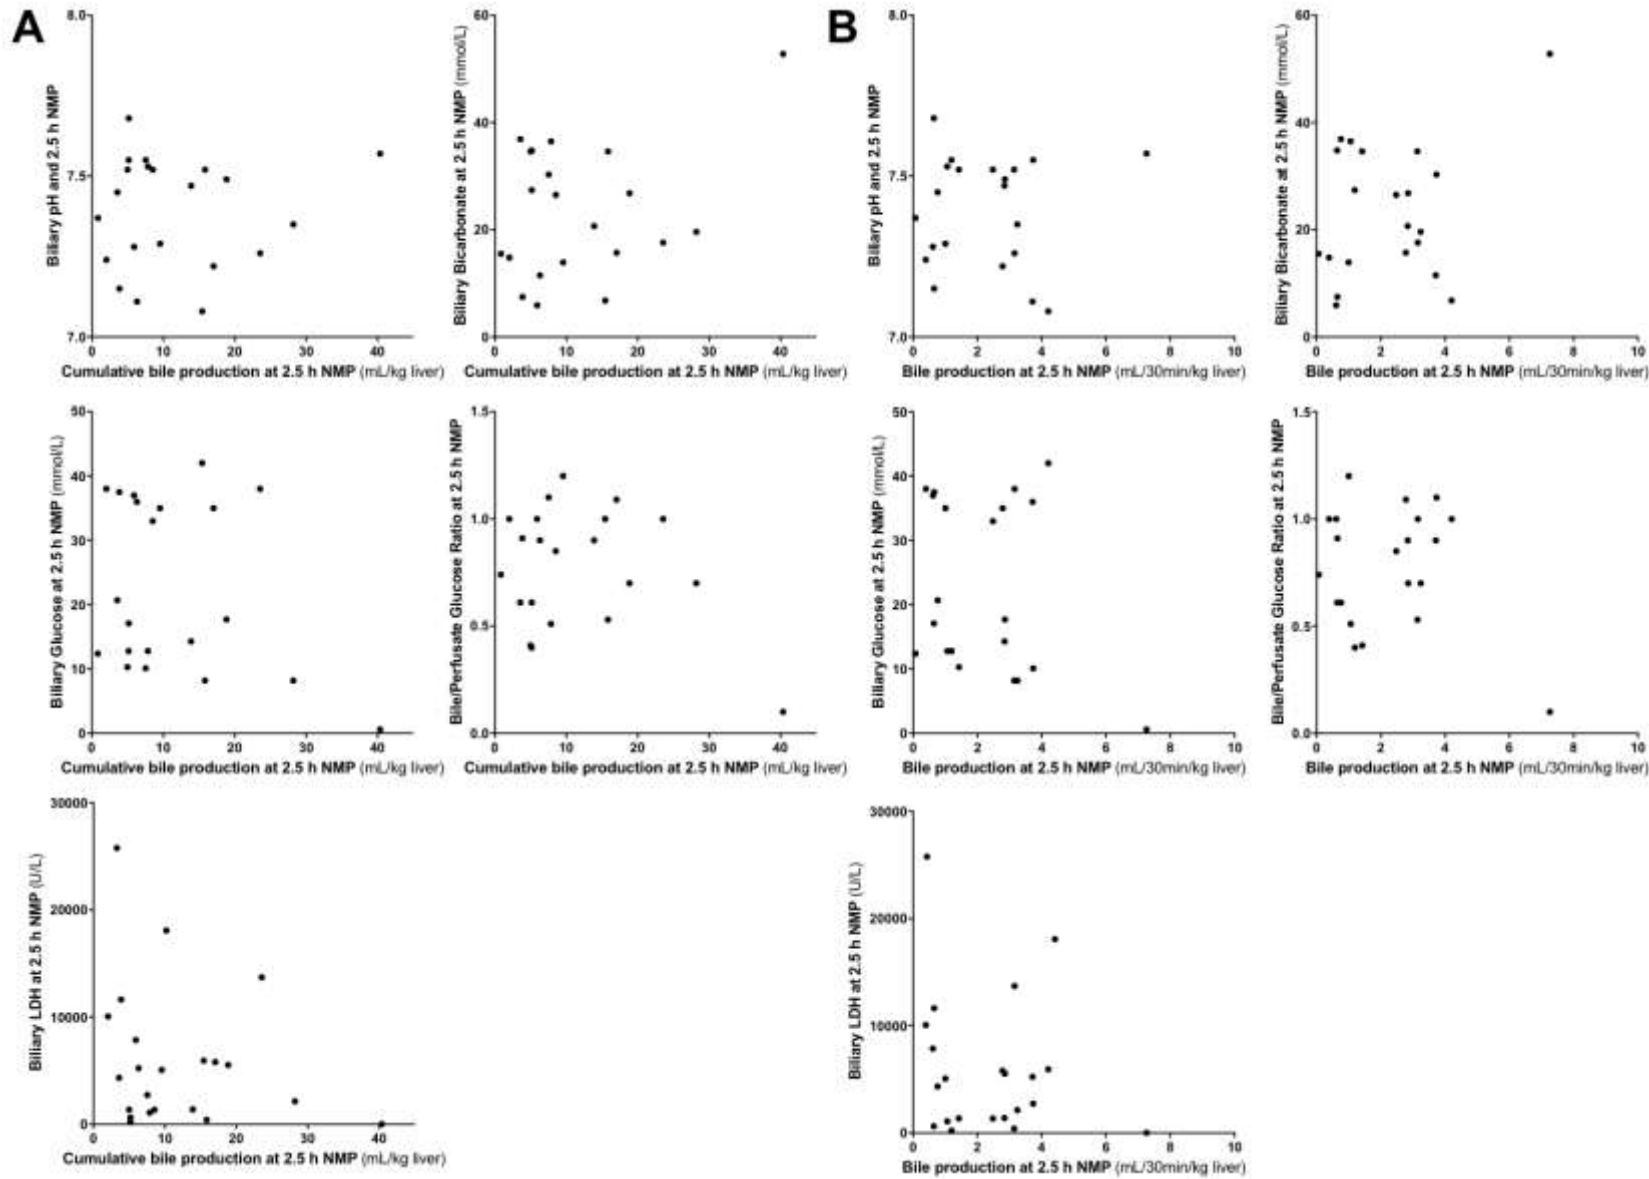

(A) Cumulative bile production and (B) bile production did not correlate with biliary pH, biliary bicarbonate, biliary glucose, bile/glucose perfusate ratio or biliary LDH.
